# Supplementary material
Source: Springer Nature journal article supplement (https://www.springermedizin.de/resource/supplementary/12886_2008_137_MOESM1_ESM.pdf/9474674)

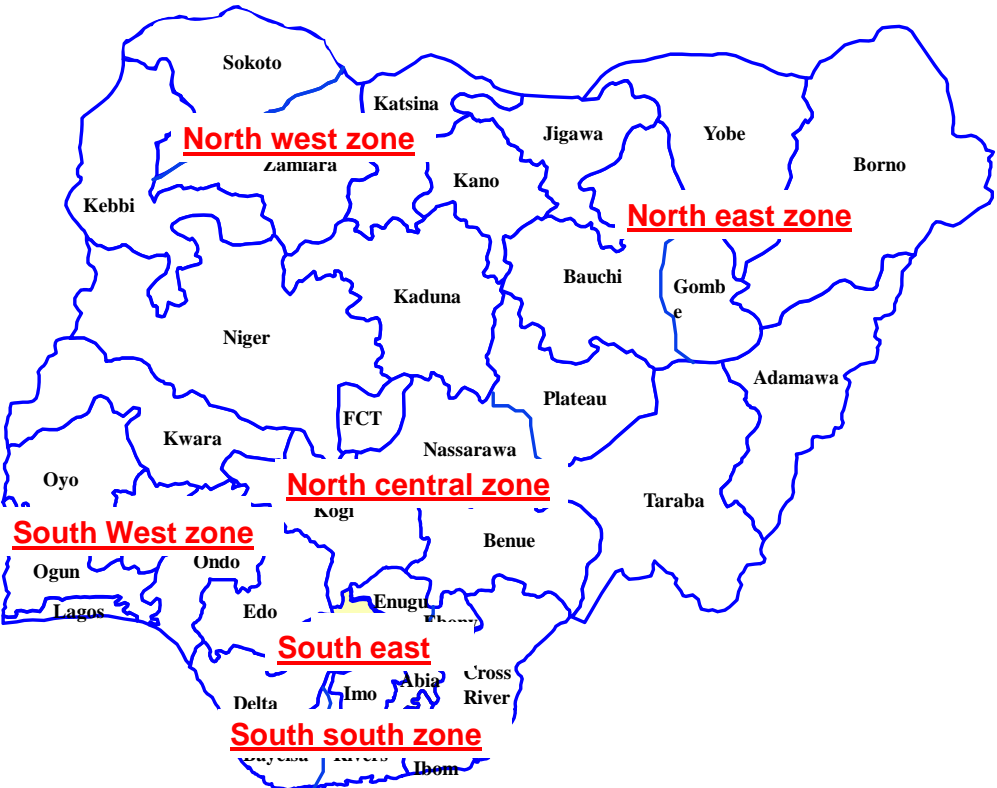

**North west zone**

**North east zone**

**North central zone**

**South West zone**

**South east**

**South south zone**

Supplement: MOESM1 [file 9474674]
